# Supplementary material for: Room temperature exciton formation and robust optical properties of CVD-grown ultrathin Bi2O2Se crystals on arbitrary substrates
Source: Royal Society of Chemistry journal article supplement (doi:10.1039/d3nr01201h), 2023-01-01
Supplement: d3nr01201h1.pdf [file d3nr01201h1.pdf]

## Supporting information

### Room Temperature Exciton Formation and Robust Optical Properties of CVD-Grown Ultrathin Bi<sub>2</sub>O<sub>2</sub>Se Crystals on Arbitrary Substrates

Md Tarik Hossain<sup>1</sup>, Tadasha Jena<sup>2</sup>, Upasana Nath<sup>3</sup>, Manabendra Sarma<sup>3</sup> and P. K. Giri<sup>1,2\*</sup>

<sup>1</sup>Department of Physics, Indian Institute of Technology Guwahati, Guwahati -781039, India

<sup>2</sup>Centre for Nanotechnology, Indian Institute of Technology Guwahati, Guwahati 781039, India

<sup>3</sup>Department of chemistry, Indian Institute of Technology Guwahati, Guwahati 781039, India

#### Index:

|                                                                                                                                    |    |
|------------------------------------------------------------------------------------------------------------------------------------|----|
| Figure S1: Optical and atomic force microscopy images of Bi <sub>2</sub> O <sub>2</sub> Se on different growth substrates.....     | 3  |
| Figure S2: Photograph and optical image of Bi <sub>2</sub> O <sub>2</sub> Se film on quartz substrate.....                         | 4  |
| Figure S3: XRD pattern of Bi <sub>2</sub> O <sub>2</sub> Se on different growth substrates.....                                    | 4  |
| Figure S4: Raman spectra of Bi <sub>2</sub> O <sub>2</sub> Se on different growth substrates.....                                  | 5  |
| Figure S5: XPS survey scan spectra of Bi <sub>2</sub> O <sub>2</sub> Se on different growth substrates.....                        | 6  |
| Figure S6: XPS high resolution spectra of Bi <sub>2</sub> O <sub>2</sub> Se on mica substrates.....                                | 6  |
| Figure S7: XPS high resolution spectra of Bi <sub>2</sub> O <sub>2</sub> Se on glass substrates.....                               | 7  |
| Figure S8: FWHM of A <sub>1g</sub> mode (Raman) as a function of growth substrates.....                                            | 7  |
| Figure S9: Absorption spectrum of Bi <sub>2</sub> O <sub>2</sub> Se/quartz .....                                                   | 7  |
| Figure S10: Crystal structure, high symmetry points and Density of states of Bi <sub>2</sub> O <sub>2</sub> Se.....                | 8  |
| Figure S11: Differentiated K-M plot (absorption spectra) of Bi <sub>2</sub> O <sub>2</sub> Se on quartz and glass substrates ..... | 8  |
| Figure S12: Absorption coefficients of Bi <sub>2</sub> O <sub>2</sub> Se on different substrates .....                             | 9  |
| Figure S13: Tauc plot (indirect gap).....                                                                                          | 9  |
| Figure S14: Optical band gap of Bi <sub>2</sub> O <sub>2</sub> Se on different growth substrates .....                             | 10 |
| Figure S15: Reflectance spectra.....                                                                                               | 10 |
| Figure S16: NIR PL spectra of Bi <sub>2</sub> O <sub>2</sub> Se.....                                                               | 11 |
| Figure S17: Differentiated reflectance and PL of Bi <sub>2</sub> O <sub>2</sub> Se on mica substrate .....                         | 11 |
| Figure S18: Differentiated reflectance and PL of Bi <sub>2</sub> O <sub>2</sub> Se on sapphire substrate.....                      | 12 |

\* Corresponding author, email: [giri@iitg.ac.in](mailto:giri@iitg.ac.in) (PKG),

|                                                                                                           |    |
|-----------------------------------------------------------------------------------------------------------|----|
| Figure S19: Tauc plot (direct gap) .....                                                                  | 12 |
| Figure S20: Low-temperature PL of SiO <sub>2</sub> substrate.....                                         | 13 |
| Figure S21: Room temperature PL of SiO <sub>2</sub> substrate .....                                       | 13 |
| Figure S22: Electronic band structure plot of Bulk- Bi <sub>2</sub> O <sub>2</sub> Se using DFT+U.....    | 13 |
| Table S1: XPS spectra fitting parameters.....                                                             | 14 |
| Table S2: Absorption peaks of Bi <sub>2</sub> O <sub>2</sub> Se grown on different substrate.....         | 14 |
| Table S3: ‘Refractive index (η)’ of as-grown Bi <sub>2</sub> O <sub>2</sub> Se and growth substrates..... | 14 |
| Table S4: Energy value at different high symmetry k-points.....                                           | 15 |
| Table S5: Energies of different transition.....                                                           | 15 |

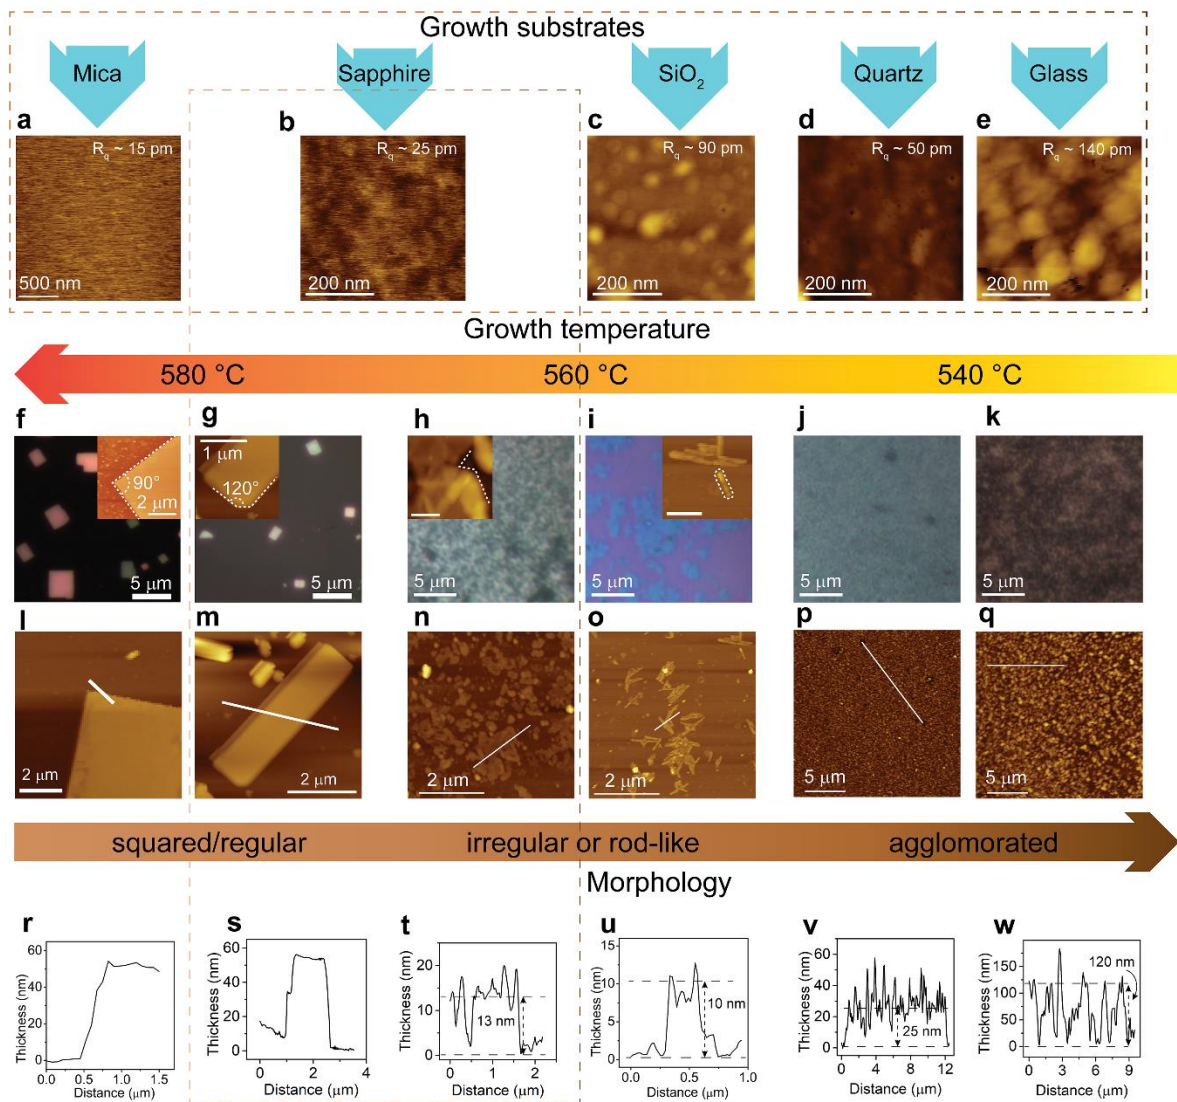

**Figure S1:** (a-e) Atomic force microscopy images of mica, sapphire, SiO<sub>2</sub>, quartz, and glass substrate denoting the roughness of the surface. (f-k) Optical microscopy images of as-grown samples on different substrates. (j-q) Topography images of as-grown samples and (r-w) their corresponding height profile. Inset of (f-i) highlights the edge morphology of the synthesized Bi<sub>2</sub>O<sub>2</sub>Se. Inset of (h and i) has the scale bar of 0.2 and 0.5 μm.

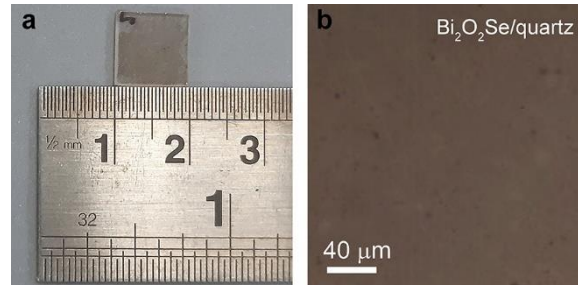

**Figure S2:** (a) Photograph of Bi<sub>2</sub>O<sub>2</sub>Se film grown over a 1×1 cm<sup>2</sup> quartz substrate. (b) Optical microscopy image of Bi<sub>2</sub>O<sub>2</sub>Se film over quartz substrate displaying large area growth.

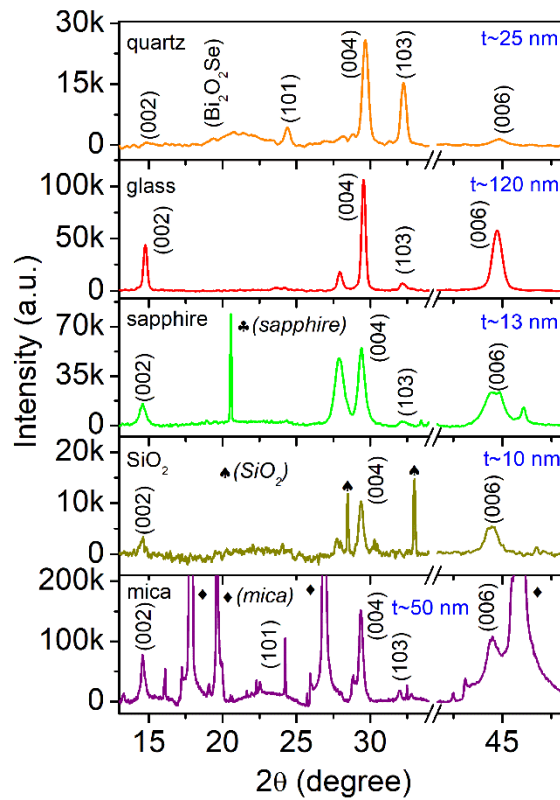

**Figure S3:** Comparative XRD pattern of Bi<sub>2</sub>O<sub>2</sub>Se crystals directly grown on mica, SiO<sub>2</sub>, sapphire, glass, and quartz substrates by CVD process.

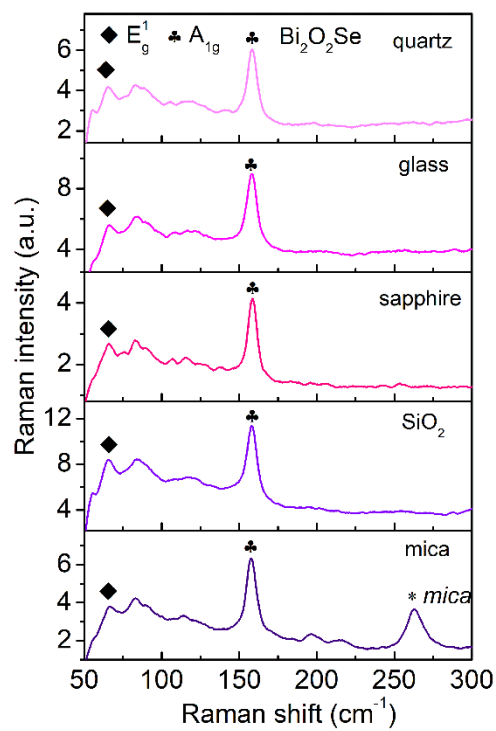

**Figure S4:** Comparative Raman spectra of  $\text{Bi}_2\text{O}_2\text{Se}$  crystals directly grown on mica,  $\text{SiO}_2$ , sapphire, glass, and quartz substrates by CVD process.

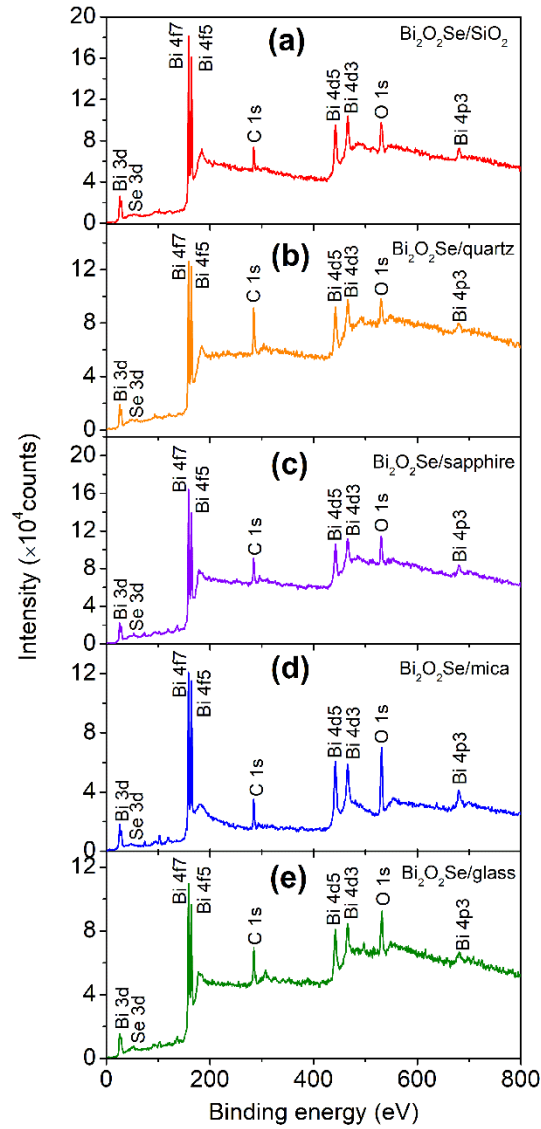

**Figure S5:** Comparative XPS survey scan spectra of  $\text{Bi}_2\text{O}_2\text{Se}$  on (a) Sapphire, (b) quartz, (c)  $\text{SiO}_2$ , (d) mica, and (e) glass substrates.

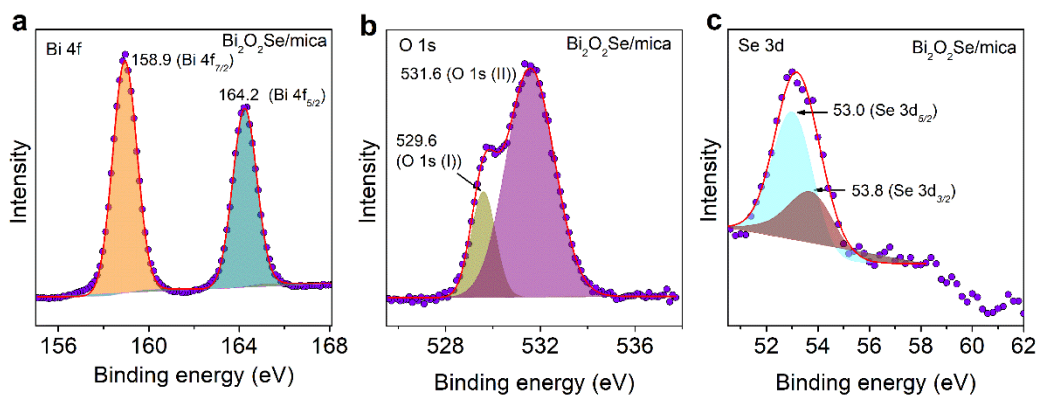

**Figure S6:** XPS spectra of  $\text{Bi}_2\text{O}_2\text{Se}$  on mica substrate: (a) Bi 4f, (b) O 1s, and (c) Se 3d. Experimental data are represented using symbols and fitted spectra using solid lines with shaded regions. Shirley's baseline was utilized for XPS spectral fitting.

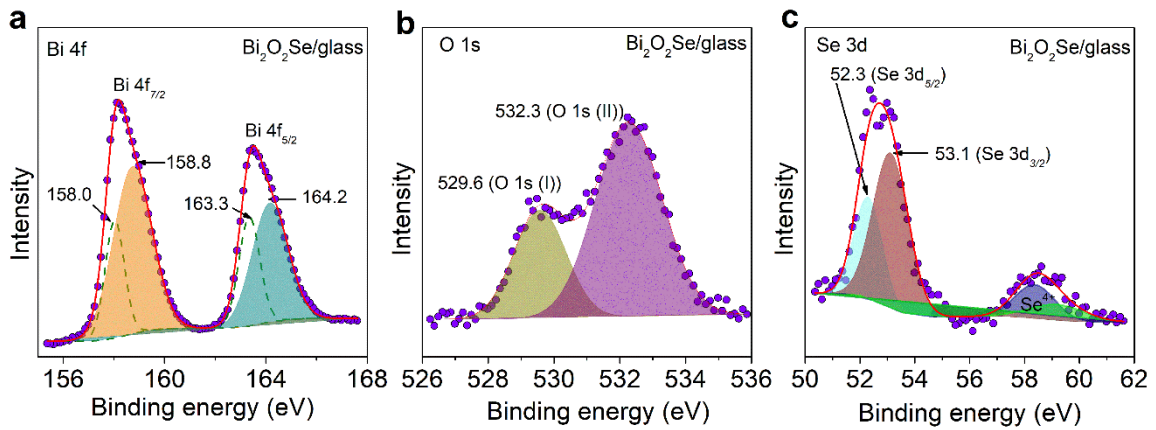

**Figure S7:** XPS spectra of  $\text{Bi}_2\text{O}_2\text{Se}$  on glass substrate: (a) Bi 4f, (b) O 1s, and (c) Se 3d. Experimental data are represented using symbols and fitted spectra using solid lines with shaded regions. Shirley's baseline was utilized for XPS spectral fitting.

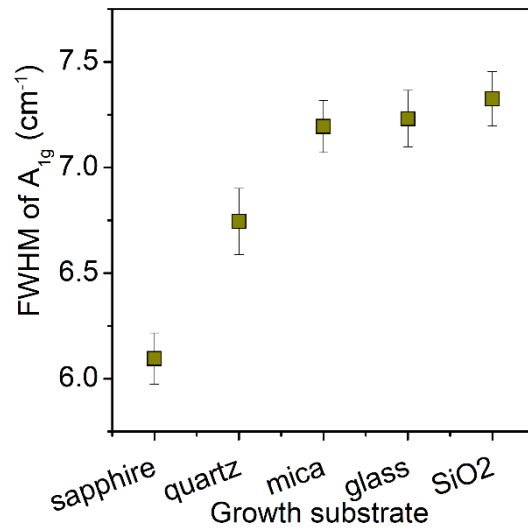

**Figure S8:** FWHM of Raman  $A_{1g}$  Raman mode of  $\text{Bi}_2\text{O}_2\text{Se}$  on different growth substrates.

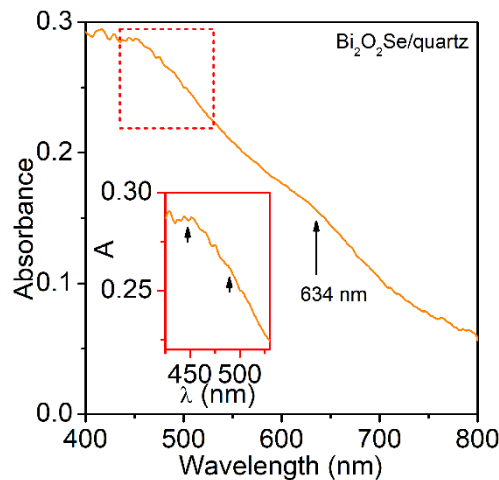

**Figure S9:** Absorption spectrum of  $\text{Bi}_2\text{O}_2\text{Se}$  on quartz substrate. The inset shows a magnified view of the absorption spectrum in the region 425-530 nm.

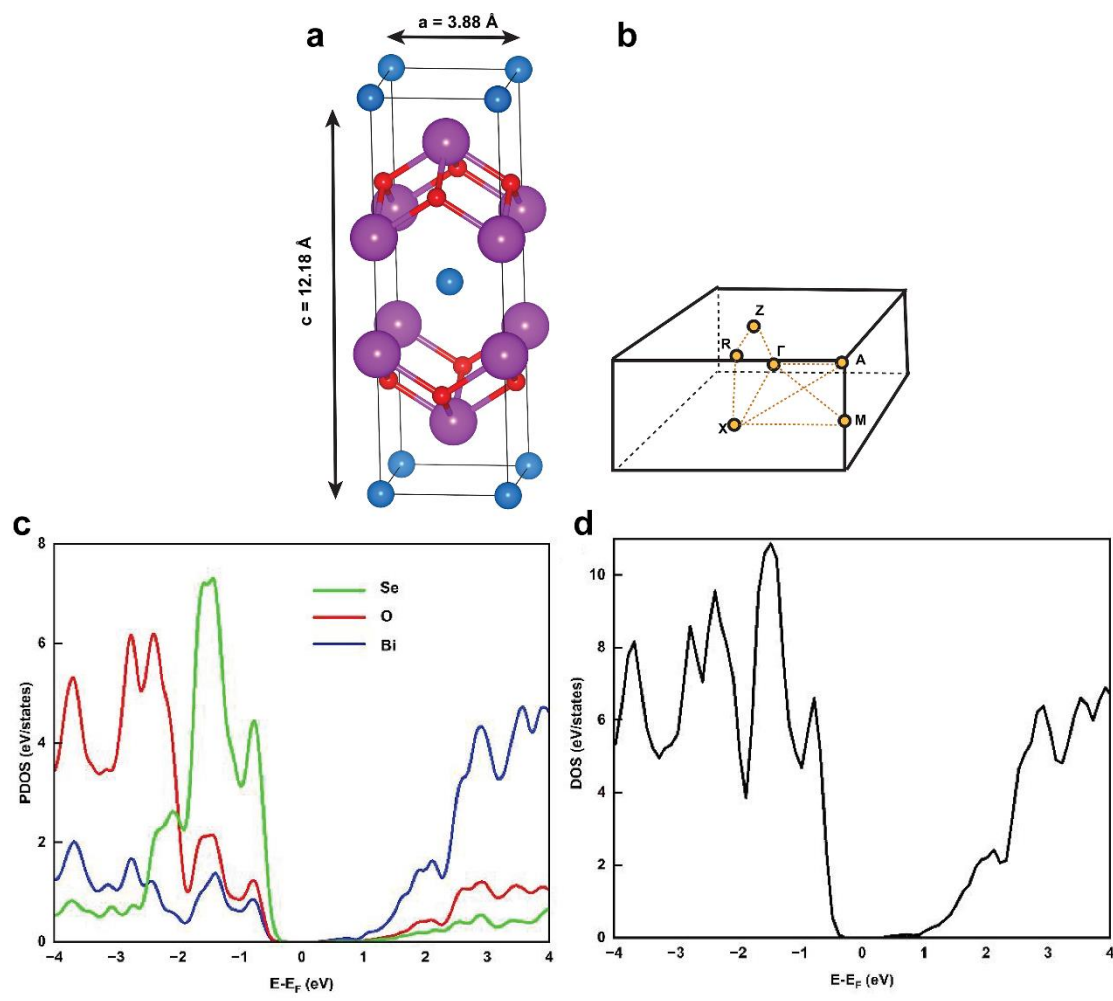

**Figure S10:** (a) Optimized structure (I4/mmm), (b) High symmetry K-point in the Brillouin zone, and (c) Partial Density of states (PDOS) of Bi, O, and Se. (d) Density of states (DOS) of Bi<sub>2</sub>O<sub>2</sub>Se. Purple, red, and blue balls depict Bi, O, and Se atoms, respectively. Fermi-level ( $E_F$ ) is set at zero.

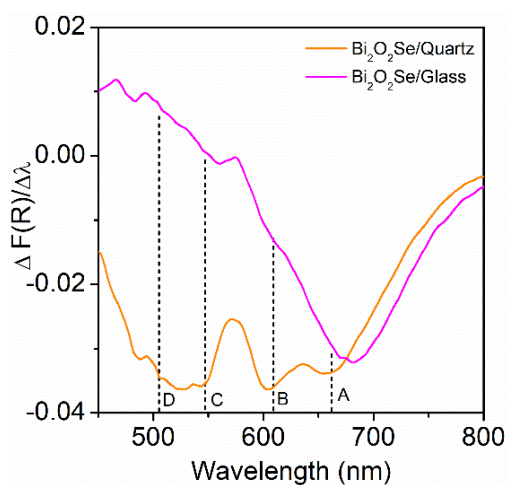

**Figure S11:** Differentiated Kubelka-Munk plot (absorption spectra) depicting multiple exciton peaks of Bi<sub>2</sub>O<sub>2</sub>Se grown on quartz and glass substrates.



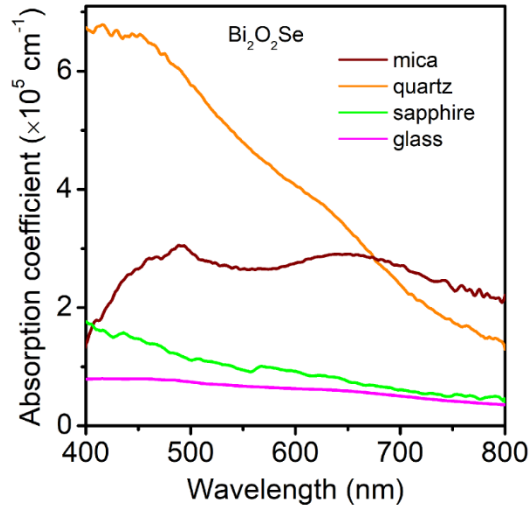

**Figure S12:** Absorption coefficients of  $\text{Bi}_2\text{O}_2\text{Se}$  grown on mica, quartz, sapphire, and glass substrates.

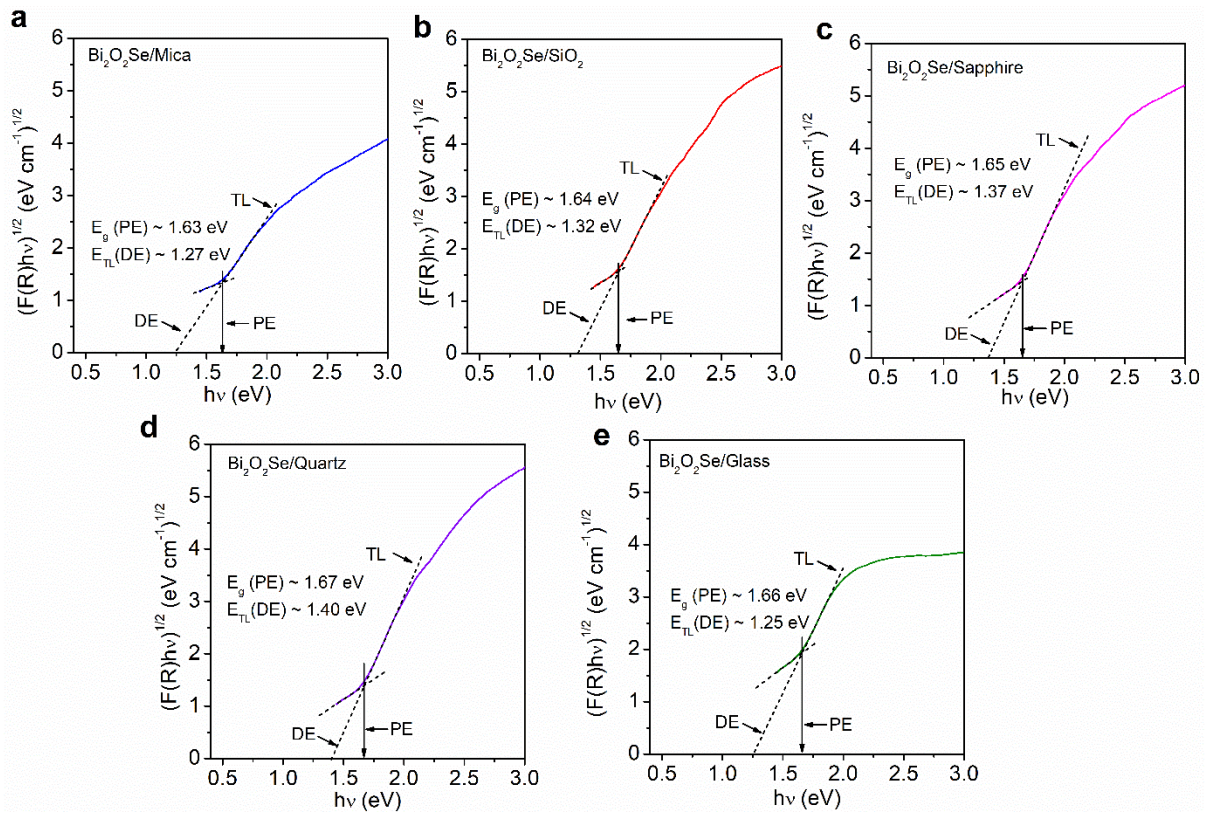

**Figure S13:** Tauc plot (indirect bandgap) of  $\text{Bi}_2\text{O}_2\text{Se}$  crystals on (a) mica, (b)  $\text{SiO}_2$ , (c) sapphire, (d) quartz, and (e) glass substrates. Direct extrapolation (DE) and proper extrapolation (PE) estimate of the optical energy gap of as-grown  $\text{Bi}_2\text{O}_2\text{Se}$  on different substrates.<sup>1,2</sup>

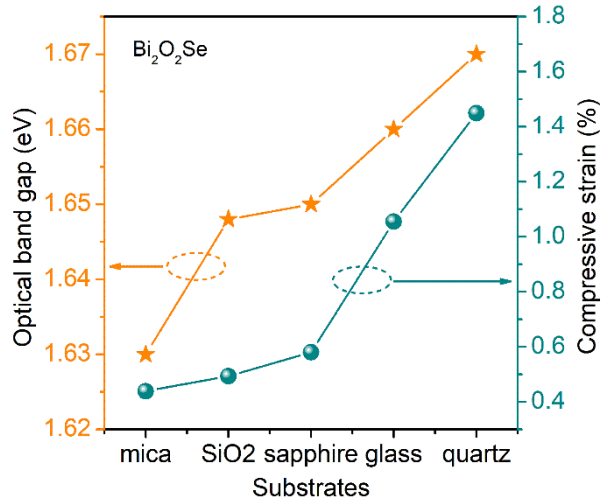

**Figure S14:** Direct correlation between the measured optical bandgap and strain in  $\text{Bi}_2\text{O}_2\text{Se}$  crystals on different substrate.

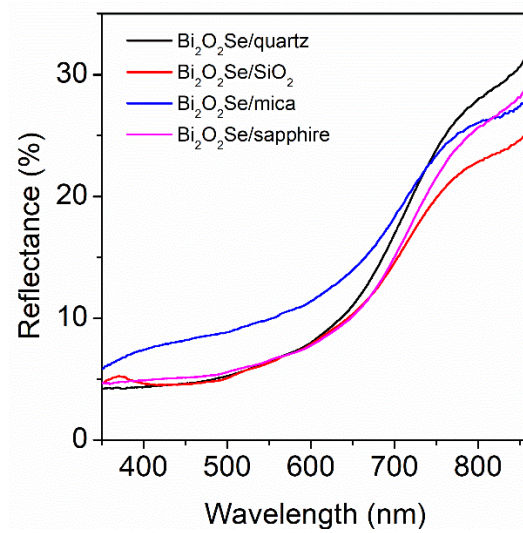

**Figure S15:** Reflectance spectra of  $\text{Bi}_2\text{O}_2\text{Se}$  crystals on mica, quartz, sapphire, and  $\text{SiO}_2$  substrates.

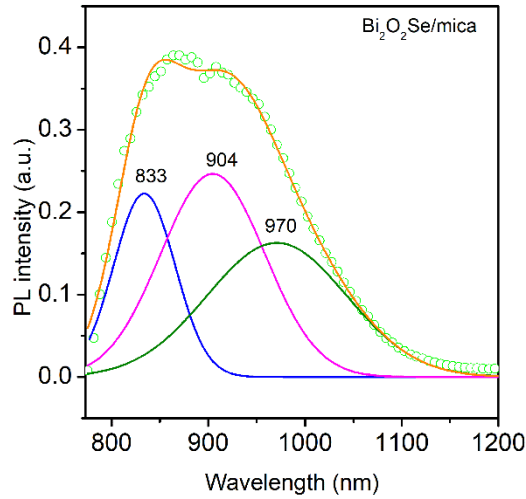

**Figure S16:** NIR PL spectra of Bi<sub>2</sub>O<sub>2</sub>Se crystals on mica substrates. The solid lines are Gaussian fitted spectra showing 833, 904, 970 nm peaks originating from indirect transitions. Symbols represents the experimental data.

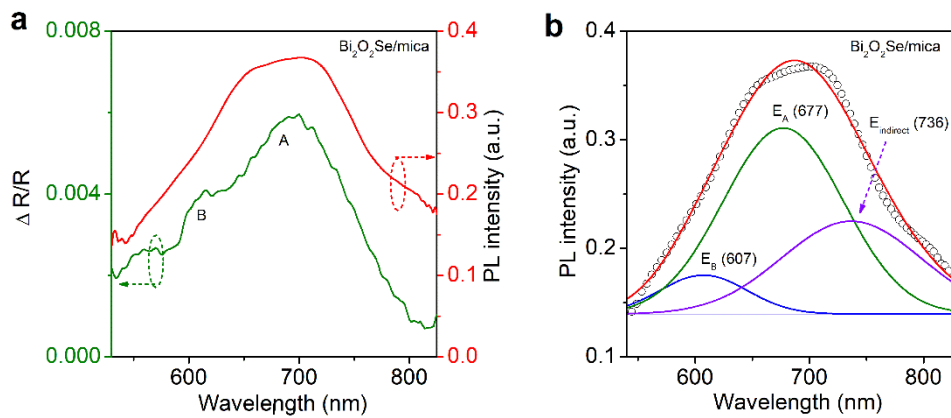

**Figure S17:** (a) Differential reflectance spectrum (left y-axis) and PL spectrum (right y-axis) of Bi<sub>2</sub>O<sub>2</sub>Se crystals grown on mica substrate. (b) Deconvoluted PL spectra of Bi<sub>2</sub>O<sub>2</sub>Se on mica.

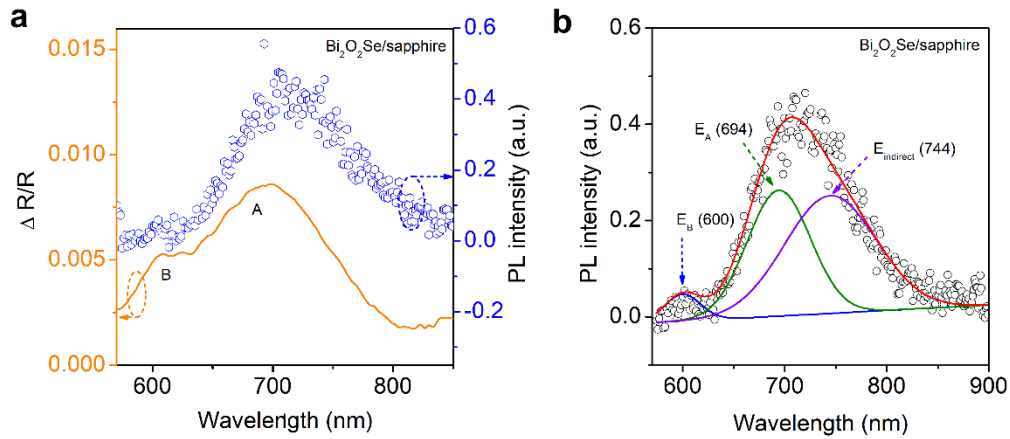

**Figure S18:** (a) Differential reflectance spectrum (left y-axis) and PL spectrum (right y-axis) of  $\text{Bi}_2\text{O}_2\text{Se}$  crystals grown on a sapphire substrate. (b) Deconvoluted PL spectra of  $\text{Bi}_2\text{O}_2\text{Se}$  on sapphire.

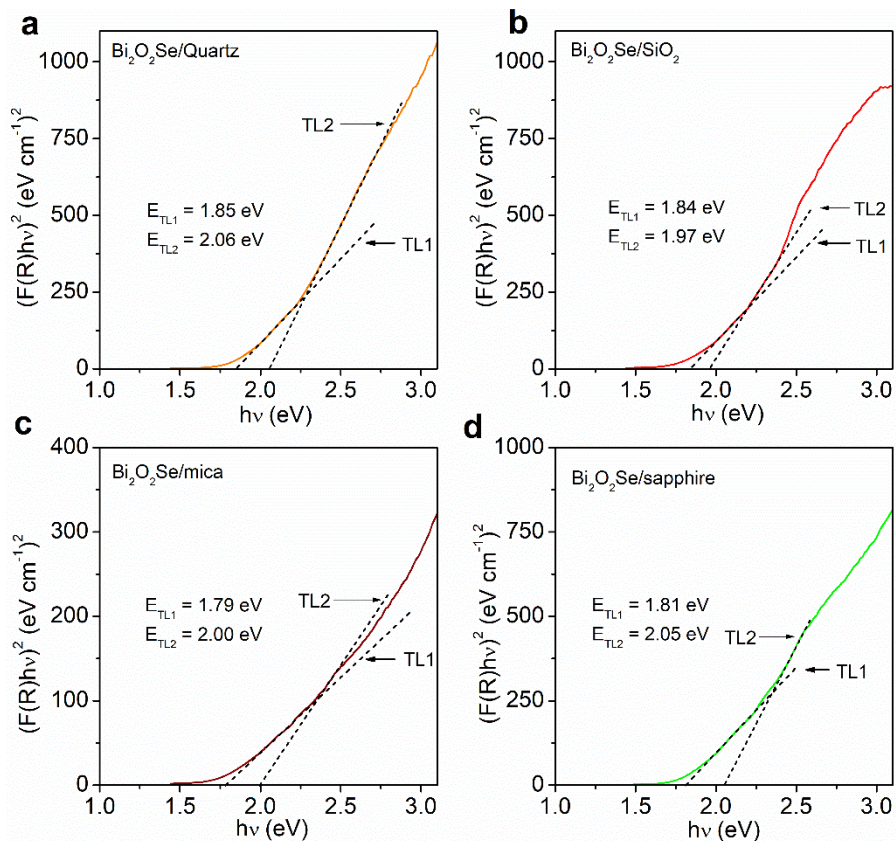

**Figure S19:** Tauc plot considering the direct band gap of  $\text{Bi}_2\text{O}_2\text{Se}$  crystals on (a) mica, (b)  $\text{SiO}_2$ , (c) sapphire, (d) quartz, and (e) glass substrates. Tauc line 1 (TL1) defines the first direct optical transition, while Tauc line 2 (TL2) signifies the second direct optical transition.

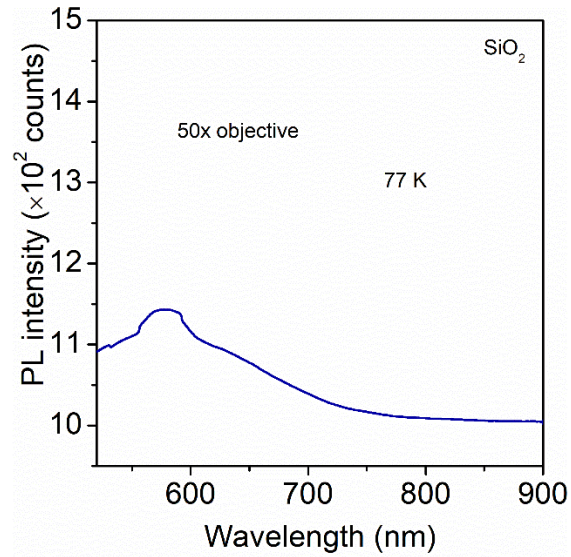

**Figure S20:** Low temperature (77 K) PL spectrum of bare SiO<sub>2</sub> substrate.

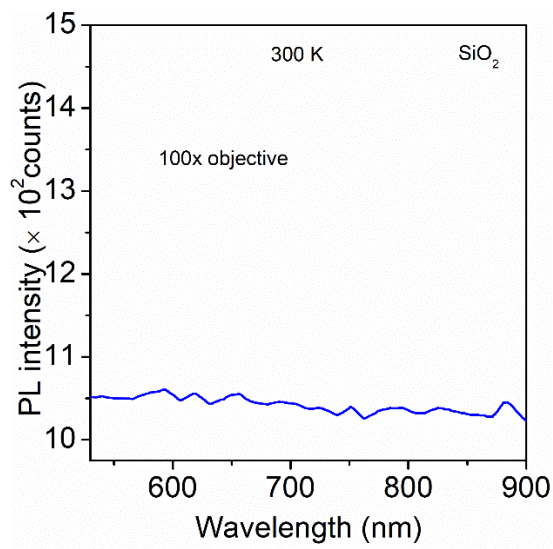

**Figure S21:** Room temperature (300 K) PL spectrum of bare SiO<sub>2</sub> substrate.

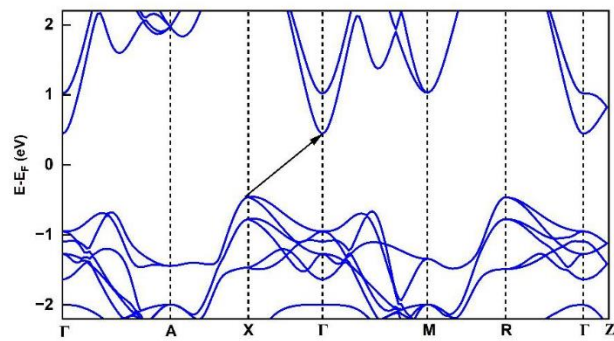

**Figure S22:** Electronic band structure plot of Bulk- Bi<sub>2</sub>O<sub>2</sub>Se using DFT+U.

**Table S1:** Fitting parameters of XPS spectra showing the binding energies of each element (Bi 4f, O 1s, Se 3d) in Bi<sub>2</sub>O<sub>2</sub>Se grown on different substrates.

| Growth Substrate | Growth temperature (°C) | Binding energies (eV) |                   |       |       |                   |                   |                  |      |
|------------------|-------------------------|-----------------------|-------------------|-------|-------|-------------------|-------------------|------------------|------|
|                  |                         | Bi                    |                   | O1s   |       | Se <sup>2+</sup>  |                   | Se <sup>4+</sup> |      |
|                  |                         | 4f <sub>7/2</sub>     | 4f <sub>5/2</sub> | (I)   | (II)  | 3d <sub>5/2</sub> | 3d <sub>3/2</sub> | (I)              | (II) |
| Sapphire         | 560                     | 158.8                 | 164.2             | 530.1 | 530.8 | 53.0              | 53.8              | 58.5             | 59.3 |
| Quartz           | 540                     | 159.0                 | 164.3             | 529.9 | 531.5 | 53.1              | 53.8              | 58.6             | 59.4 |
| SiO <sub>2</sub> | 560                     | 159.2                 | 164.5             | 530.0 | 531.9 | 52.8              | 53.7              | 58.8             | 59.9 |
| Mica             | 560                     | 158.9                 | 164.2             | 529.6 | 531.6 | 53.0              | 53.8              | -                | -    |
| Glass            | 540                     | 158.8                 | 164.2             | 529.6 | 532.3 | 52.3              | 53.1              | 58.4             | 59.2 |

**Table S2:** Absorption peak positions of Bi<sub>2</sub>O<sub>2</sub>Se for different growth substrates.

| Growth Substrate | Peak positions (nm)       |
|------------------|---------------------------|
| Mica             | ~460 nm, ~490 nm, ~654 nm |
| Glass            | ~456 nm, ~484 nm, ~649 nm |
| Quartz           | ~435 - 550 nm, ~634 nm    |
| Sapphire         | ~450 nm, ~486 nm, ~651 nm |
| SiO <sub>2</sub> | ~455 nm, ~486 nm, ~662 nm |

**Table S3:** 'Refractive index (*n*)' of as-grown Bi<sub>2</sub>O<sub>2</sub>Se and the growth substrates.

| Growth substrate | <i>n</i> of growth substrate | <i>n</i> of Bi <sub>2</sub> O <sub>2</sub> Se on the growth substrate |
|------------------|------------------------------|-----------------------------------------------------------------------|
| Quartz           | 1.40                         | 3.367                                                                 |
| SiO <sub>2</sub> | 1.47                         | 3.375                                                                 |
| Glass            | 1.52                         | 3.370                                                                 |
| Mica             | 1.56                         | 3.378                                                                 |
| Sapphire         | 1.77                         | 3.373                                                                 |

**Table S4:** Energy values at different high symmetry k-points, as obtained from the DFT calculation.

| Valance Band (eV)     |       | Conduction Band (eV)  |      |
|-----------------------|-------|-----------------------|------|
| $\Gamma_{VB}$ (outer) | -0.99 | $\Gamma_{CB}$ (outer) | 0.87 |
| $\Gamma_{VB}$ (inner) | -1.36 | $\Gamma_{CB}$ (inner) | 1.27 |
| $X_{VB}$              | -0.44 | -                     | -    |
| $M_{VB}$              | -1.40 | $M_{CB}$ (outer)      | 1.23 |
| -                     | -     | $M_{CB}$ (inner)      | 1.42 |
| $R_{VB}$              | -0.45 | -                     | -    |
| $A_{VB}$              | -1.52 | $A_{CB}$              | 2.13 |
| $Z_{VB}$              | -1.13 | -                     | -    |

**Table S5:** Summary of energy differences at high symmetry k-points due to different indirect and direct transitions calculated theoretically and observed experimentally.

| Transitions                                  | Theoretical values |                 | Exciton        | Experimental values |
|----------------------------------------------|--------------------|-----------------|----------------|---------------------|
|                                              | Energy (eV)        | Wavelength (nm) |                | Wavelength (nm)     |
| $\Gamma_{VB}$ (outer)– $\Gamma_{CB}$ (outer) | 1.86               | 667             | A              | 683                 |
| $\Gamma_{VB}$ (inner)– $\Gamma_{CB}$ (outer) | 2.23               | 556             | B              | 606                 |
| $\Gamma_{VB}$ (outer)– $\Gamma_{VB}$ (inner) | 2.26               | 548             | C              | 551                 |
| $\Gamma_{VB}$ (inner)– $\Gamma_{CB}$ (inner) | 2.63               | 471             | D              | 500                 |
| $M_{VB}$ – $M_{CB}$ (outer)                  | 2.63               | 471             |                |                     |
| $M_{VB}$ – $M_{CB}$ (inner)                  | 2.82               | 440             | E              |                     |
| $X_{VB}$ – $\Gamma_{CB}$ (outer)             | 1.31               | 946             | $E_{indirect}$ | 970                 |
| $R_{VB}$ – $\Gamma_{CB}$ (outer)             | 1.32               | 939             |                | 904                 |
| $X_{VB}$ – $M_{CB}$ (outer)                  | 1.67               | 743             |                | 833                 |
| $R_{VB}$ – $M_{CB}$ (outer)                  | 1.68               | 738             |                | 728                 |
| $X_{VB}$ – $\Gamma_{CB}$ (inner)             | 1.71               | 725             |                |                     |
| $R_{VB}$ – $\Gamma_{CB}$ (inner)             | 1.72               | 721             |                |                     |
| $R_{VB}$ – $M_{CB}$ (inner)                  | 1.87               | 663             |                |                     |
| $\Gamma_{VB}$ (outer)– $M_{CB}$ (outer)      | 2.22               | 559             |                |                     |
| $M_{VB}$ – $\Gamma_{CB}$ (outer)             | 2.27               | 546             |                |                     |
| $\Gamma_{VB}$ (outer)– $M_{CB}$ (inner)      | 2.41               | 515             |                |                     |
| $\Gamma_{VB}$ (inner)– $M_{CB}$ (outer)      | 2.59               | 479             |                |                     |
| $M_{VB}$ – $\Gamma_{CB}$ (inner)             | 2.67               | 464             |                |                     |
| $\Gamma_{VB}$ (inner)– $M_{CB}$ (inner)      | 2.78               | 446             |                |                     |

### References:

- 1 Jubu, P. R., Yam, F. K., Igba, V. M. & Beh, K. P. Tauc-plot scale and extrapolation effect on bandgap estimation from UV–vis–NIR data – A case study of  $\beta$ -Ga<sub>2</sub>O<sub>3</sub>. *Journal of Solid State Chemistry* **290**, 121576, doi:https://doi.org/10.1016/j.jssc.2020.121576 (2020).
- 2 Jubu, P. R. *et al.* Influence of the secondary absorption and the vertical axis scale of the Tauc's plot on optical bandgap energy. *Journal of Optics*, doi:10.1007/s12596-022-00961-6 (2022).
